# Supplementary material for: Complexation behavior of trivalent actinides and lanthanides with 1,10-phenanthroline-2,9-dicarboxylic acid based ligands: insight from density functional theory
Source: Royal Society of Chemistry journal article supplement (doi:10.1039/c2cp40083a), 2012-01-01
Supplement: c2cp40083a.pdf [file c2cp40083a.pdf]

# Complexation behavior of trivalent Actinides and Lanthanides with 1,10-Phenanthroline-2,9-dicarboxylic acid based ligands: Insight from Hard Soft Acid Base Principle.

Debashree Manna and Tapan K Ghanty\*

## Electronic Supplementary Information

### Contents:

#### (1) Table Captions

1. Table S1. Calculated M-L bond distances (Å) and complexation energies (eV) in gas ( $\Delta E_g$ ) and solvent ( $\Delta E_s$ ) phases for Am and Eu complexes with TZVP/BP86 method.
2. Table S2. Calculated Bond distances (Å) for  $[ML]^+$  complexes obtained from ADF software with TZ2P basis sets and BP86 exchange-correlation functional in the gas phase.
3. Table S3. Effect of different Exchange correlation functionals (PBE and BLYP) on the M-L bond distance (d in Å) of  $[ML]^+$  complexes calculated using def-SV(P).
4. Table S4. Calculated Hardness and Softness values of the metal ions, dianionic form of the bare ligands and  $[M-PHEN]^{3+}$  complexes in gas and solvent phases using def-SV(P)/BP86 method.
5. Table S5. Calculated values of charges on donor center and Fukui indices for the nucleophilic attack on the donor sites in gas and solvent phases for the dianionic form of the bare ligands using def-SV(P)/BP86 method.
6. Table S6. Calculated values of Fukui indices for the electrophilic attack on the metal centre of  $[M-PHEN]^{3+}$  complexes in gas and solvent phases using def-SV(P)/BP86 method.
7. Table S7. Calculated atomic charges on metal and donor centers of Am and Eu complexes ( $[ML]^+$  and  $[ML_2]^{-1}$ ) in Gas and Solvent phases using TZVP/BP86 method.
8. Table S8. Calculated atomic charges at metal centers ( $q_M$ ) of the complexes  $[ML]^+$  for different exchange correlation functionals (PBE and BLYP) using def-SV(P)
9. Table S9. Calculated atomic charges on metal and donor centers of U and Ce complexes ( $[ML_2]^{-1}$ ) in Gas and Solvent phases using TZVP/BP86 method

## (2) Figure Captions

1. Figure S1. Molecular structure of  $[\text{Metal-PHEN}]^{3+}$  Complexes, where M= Am/Eu/U/Ce.
2. Figure S2. Valence level occupied molecular orbitals of a) Metal Complexes,  $[\text{ML}]^+$  and b)  $[\text{Metal-PHEN}]^{3+}$  Complexes, where M= Am/Eu/U/Ce, L= PDA, TCA1, TCA, THIO.  
PDA: 1,10-Phenanthroline-2,9-dicarboxylic acid;  
TCA1: 1,10-Phenanthroline-2,9-mono-thio-dicarboxylic Acid (binding through Oxygen);  
TCA: 1,10-Phenanthroline-2,9-mono-thio-dicarboxylic Acid (binding through Sulphur);  
and THIO: 1,10-Phenanthroline-2,9-di-thio-dicarboxylic Acid.

**Table S1. Calculated M-L bond distances (Å) and complexation energies (eV) in gas ( $\Delta E_g$ ) and solvent ( $\Delta E_s$ ) phases for Am and Eu complexes with TZVP/BP86 method**

| Complex              | M-O/M-S | M-N   | M-O/M-S | M-N     | $(\Delta E_g)$ | $(\Delta E_s)$ |
|----------------------|---------|-------|---------|---------|----------------|----------------|
|                      | Gas     | Gas   | Solvent | Solvent |                |                |
| $[\text{Am-PDA}]^+$  | 2.182   | 2.506 | 2.275   | 2.523   | -40.37         | -5.62          |
| $[\text{Eu-PDA}]^+$  | 2.227   | 2.527 | 2.329   | 2.562   | -41.45         | -3.63          |
| $[\text{Am-TCA1}]^+$ | 2.223   | 2.499 | 2.299   | 2.519   | -39.52         | -5.14          |
| $[\text{Eu-TCA1}]^+$ | 2.305   | 2.525 | 2.372   | 2.572   | -40.98         | -3.33          |
| $[\text{Am-TCA}]^+$  | 2.638   | 2.576 | -----   | -----   | -39.17         | -----          |
| $[\text{Eu-TCA}]^+$  | 2.679   | 2.575 | -----   | -----   | -40.47         | -----          |
| $[\text{Am-THIO}]^+$ | 2.697   | 2.553 | -----   | -----   | -38.84         | -----          |
| $[\text{Eu-THIO}]^+$ | 2.769   | 2.550 | -----   | -----   | -40.39         | -----          |

**Table S2. Calculated Bond distances (d in Å) for [ML]<sup>+</sup> complexes obtained from ADF software with TZ2P basis sets and BP86 exchange-correlation functional in the gas phase**

|             |                    | Bond Distances     |                    |                    |                    |                    |                    |                    |
|-------------|--------------------|--------------------|--------------------|--------------------|--------------------|--------------------|--------------------|--------------------|
| →<br>Ligand | PDA                |                    | TCA1               |                    | TCA                |                    | THIO               |                    |
| ↓Metal      | d <sub>M-O</sub> Å | d <sub>M-N</sub> Å | d <sub>M-O</sub> Å | d <sub>M-N</sub> Å | d <sub>M-S</sub> Å | d <sub>M-N</sub> Å | d <sub>M-S</sub> Å | d <sub>M-N</sub> Å |
| Am          | 2.193              | 2.506              | 2.233              | 2.500              | 2.579              | 2.645              | 2.566              | 2.688              |
| Eu          | 2.222              | 2.508              | 2.292              | 2.503              | 2.556              | 2.673              | 2.539              | 2.739              |
| U           | 2.152              | 2.434              | 2.141              | 2.407              | 2.428              | 2.613              | 2.418              | 2.619              |
| Ce          | 2.206              | 2.506              | 2.213              | 2.493              | 2.518              | 2.677              | 2.495              | 2.676              |

**Table S3. Effect of different Exchange correlation functionals (PBE and BLYP) on the M-L bond distance (d in Å) of [ML]<sup>+</sup> complexes calculated using def-SV(P)**

| LIGAND NAME | METAL | B-LYP            |                  | PBE              |                  |
|-------------|-------|------------------|------------------|------------------|------------------|
|             |       | d <sub>M-O</sub> | d <sub>M-N</sub> | d <sub>M-O</sub> | d <sub>M-N</sub> |
| PDA         | Ce    | 2.223            | 2.571            | 2.207            | 2.545            |
|             | Eu    | 2.233            | 2.548            | 2.218            | 2.531            |
|             | U     | 2.172            | 2.474            | 2.147            | 2.438            |
|             | Am    | 2.198            | 2.533            | 2.179            | 2.508            |
| TCA1        | Ce    | 2.233            | 2.552            | 2.217            | 2.526            |
|             | Eu    | 2.307            | 2.547            | 2.292            | 2.523            |
|             | U     | 2.172            | 2.469            | 2.147            | 2.435            |
|             | Am    | 2.237            | 2.528            | 2.217            | 2.501            |
| TCA         | Ce    | 2.660            | 2.534            | 2.654            | 2.534            |
|             | Eu    | 2.699            | 2.593            | 2.669            | 2.576            |
|             | U     | 2.651            | 2.459            | 2.607            | 2.410            |
|             | Am    | 2.663            | 2.603            | 2.629            | 2.576            |
| THIO        | Ce    | 2.700            | 2.533            | 2.682            | 2.529            |
|             | Eu    | 2.793            | 2.570            | 2.753            | 2.541            |
|             | U     | 2.653            | 2.439            | 2.640            | 2.435            |
|             | Am    | 2.727            | 2.580            | 2.688            | 2.556            |

**Table S4. Calculated Hardness and Softness values of the metal ions, dianionic form of the bare ligands and [M-PHEN]<sup>3+</sup> complexes in gas and solvent phases using def-SV(P)/BP86 method**

| COMPLEX NAME             | HARDNESS  |       | SOFTNESS  |        |
|--------------------------|-----------|-------|-----------|--------|
|                          | Gas Phase | Solv  | Gas Phase | Solv   |
| Am <sup>3+</sup>         | 0.526     | 0.270 | 1.901     | 3.708  |
| Eu <sup>3+</sup>         | 0.682     | 0.395 | 1.466     | 2.533  |
| U <sup>3+</sup>          | 0.497     | 0.258 | 2.013     | 3.869  |
| Ce <sup>3+</sup>         | 0.630     | 0.383 | 1.588     | 2.609  |
| [PDA] <sup>2-</sup>      | 0.196     | 0.126 | 5.097     | 7.914  |
| [TCA/TCA1] <sup>2-</sup> | 0.187     | 0.095 | 5.352     | 10.571 |
| [THIO] <sup>2-</sup>     | 0.179     | 0.099 | 5.581     | 10.062 |
| PHEN                     | 0.305     | 0.177 | 3.282     | 5.654  |
| [Am-PHEN] <sup>3+</sup>  | 0.176     | 0.077 | 5.680     | 12.943 |
| [Eu-PHEN] <sup>3+</sup>  | 0.179     | 0.072 | 5.596     | 13.964 |
| [U-PHEN] <sup>3+</sup>   | 0.237     | 0.135 | 4.216     | 7.429  |
| [Ce-PHEN] <sup>3+</sup>  | 0.231     | 0.119 | 4.324     | 8.435  |

**Table S5. Calculated values of charges on donor center and Fukui indices for the nucleophilic attack on the donor sites in gas and solvent phases for the dianionic form of the bare ligands using def-SV(P)/BP86 method**

**GAS PHASE RESULTS:**

| LIGAND NAME          | q <sub>N</sub> | q <sub>O</sub> /q <sub>S</sub> | $f_k^-(O)$ or $f_k^-(S)$ | $f_k^-(N)$ | $f_{el}(O)$ or $f_{el}(S)$ | $f_{el}(N)$ |
|----------------------|----------------|--------------------------------|--------------------------|------------|----------------------------|-------------|
| [PDA] <sup>2-</sup>  | -0.446         | -0.691                         | 0.142                    | 0.040      | 3.017                      | 3.137       |
| [TCA1] <sup>2-</sup> | -0.445         | -0.589                         | 0.068                    | 0.024      | 1.623                      | 0.933       |
| [TCA] <sup>2-</sup>  | -0.445         | -0.450                         | 0.290                    | 0.024      | 2.273                      | 0.933       |
| [THIO] <sup>2-</sup> | -0.439         | -0.196                         | 0.202                    | 0.010      | 2.335                      | 1.189       |

**SOLV PHASE RESULTS:**

| LIGAND NAME          | q <sub>N</sub> | q <sub>O</sub> /q <sub>S</sub> | $f_k^-(O)$ or $f_k^-(S)$ | $f_k^-(N)$ |
|----------------------|----------------|--------------------------------|--------------------------|------------|
| [PDA] <sup>2-</sup>  | -0.496         | -0.756                         | 0.129                    | 0.061      |
| [TCA1] <sup>2-</sup> | -0.493         | -0.639                         | 0.061                    | 0.028      |
| [TCA] <sup>2-</sup>  | -0.493         | -0.491                         | 0.331                    | 0.028      |
| [THIO] <sup>2-</sup> | -0.496         | -0.227                         | 0.203                    | 0.024      |

**Table S6. Calculated values of Fukui indices for the electrophilic attack on the metal centre of [M-PHEN]<sup>3+</sup> complexes in gas and solvent phases using def-SV(P)/BP86 method**

| COMPLEX NAME            | $f_k^+$ (M) |            | $f_{nu}$ (M) |
|-------------------------|-------------|------------|--------------|
|                         | Gas Phase   | Solv phase | Gas Phase    |
| [Am-PHEN] <sup>3+</sup> | 0.280       | 0.531      | 1.456        |
| [Eu-PHEN] <sup>3+</sup> | 0.152       | 0.307      | 1.029        |
| [U-PHEN] <sup>3+</sup>  | 0.607       | 0.905      | 3.529        |
| [Ce-PHEN] <sup>3+</sup> | 0.327       | 0.511      | 1.741        |

**Table S7. Calculated atomic charges on metal and donor centers of Am and Eu complexes ([ML]<sup>+</sup> and [ML<sub>2</sub>]<sup>-1</sup>) in Gas and Solvent phases using TZVP/BP86 method**

| Complex                                | q <sub>M</sub> | q <sub>N</sub> | q <sub>O</sub> / q <sub>S</sub> | q <sub>M</sub> | q <sub>N</sub> | q <sub>O</sub> / q <sub>S</sub> |
|----------------------------------------|----------------|----------------|---------------------------------|----------------|----------------|---------------------------------|
|                                        | Gas            | Gas            | Gas                             | Solvent        | Solvent        | Solvent                         |
| [Am-PDA] <sup>+</sup>                  | 2.049          | -0.502         | -0.758                          | 2.325          | -0.476         | -0.759                          |
| [Eu-PDA] <sup>+</sup>                  | 1.960          | -0.490         | -0.738                          | 2.284          | -0.453         | -0.729                          |
| [Am-TCA1] <sup>+</sup>                 | 2.008          | -0.517         | -0.726                          | 2.309          | -0.485         | -0.702                          |
| [Eu-TCA1] <sup>+</sup>                 | 1.882          | -0.504         | -0.717                          | 2.174          | -0.565         | -0.709                          |
| [Am-(PDA) <sub>2</sub> ] <sup>-</sup>  | 1.724          | -0.409         | -0.677                          | 1.722          | -0.424         | -0.701                          |
| [Eu-(PDA) <sub>2</sub> ] <sup>-</sup>  | 1.640          | -0.394         | -0.667                          | 1.647          | -0.410         | -0.690                          |
| [Am-(TCA1) <sub>2</sub> ] <sup>-</sup> | 1.806          | -0.433         | -0.634                          | 1.838          | -0.451         | -0.646                          |
| [Eu-(TCA1) <sub>2</sub> ] <sup>-</sup> | 1.663          | -0.449         | -0.594                          | 1.657          | -0.460         | -0.618                          |
| [Am-(TCA) <sub>2</sub> ] <sup>-</sup>  | 0.835          | -0.396         | -0.153                          | 0.901          | -0.405         | -0.230                          |
| [Eu-(TCA) <sub>2</sub> ] <sup>-</sup>  | 0.878          | -0.477         | -0.184                          | 0.886          | -0.489         | -0.237                          |
| [Am-(THIO) <sub>2</sub> ] <sup>-</sup> | 0.888          | -0.441         | 0.025                           | 0.910          | -0.445         | -0.033                          |
| [Eu-(THIO) <sub>2</sub> ] <sup>-</sup> | 0.946          | -0.429         | 0.009                           | 0.975          | -0.432         | -0.051                          |

**Table S8. Calculated atomic charges at metal centers ( $q_M$ ) of the complexes  $[ML]^+$  for different exchange correlation functionals (PBE and BLYP) using def-SV(P)**

| →<br>Ligand | $q_M$ |       |       |       |       |       |       |       |
|-------------|-------|-------|-------|-------|-------|-------|-------|-------|
|             | PDA   |       | TCA1  |       | TCA   |       | THIO  |       |
| ↓Metal      | B-LYP | PBE   | B-LYP | PBE   | BLYP  | PBE   | B-LYP | PBE   |
| Am          | 2.011 | 2.010 | 1.958 | 1.965 | 1.596 | 1.590 | 1.563 | 1.568 |
| Eu          | 1.920 | 1.918 | 1.834 | 1.843 | 1.564 | 1.557 | 1.554 | 1.542 |
| U           | 2.116 | 2.118 | 2.109 | 2.116 | 1.526 | 1.484 | 1.508 | 1.479 |
| Ce          | 2.065 | 2.059 | 2.043 | 2.042 | 1.616 | 1.607 | 1.620 | 1.606 |

**Table S9. Calculated atomic charges on metal and donor centers of U and Ce complexes ( $[ML_2]^{-1}$ ) in Gas and Solvent phases using TZVP/BP86 method**

| Complex           | $q_M$ | $q_N$  | $q_O/q_S$ | $q_M$   | $q_N$   | $q_O/q_S$ |
|-------------------|-------|--------|-----------|---------|---------|-----------|
|                   | Gas   | Gas    | Gas       | Solvent | Solvent | Solvent   |
| $[U-(PDA)_2]^-$   | 1.547 | -0.386 | -0.604    | 1.570   | -0.400  | -0.633    |
| $[Ce-(PDA)_2]^-$  | 1.696 | -0.396 | -0.668    | 1.697   | -0.413  | -0.698    |
| $[U-(TCA1)_2]^-$  | 1.566 | -0.396 | -0.572    | 1.571   | -0.407  | -0.587    |
| $[Ce-(TCA1)_2]^-$ | 1.718 | -0.413 | -0.619    | 1.717   | -0.424  | -0.640    |
| $[U-(TCA)_2]^-$   | 0.253 | -0.381 | 0.002     | 0.472   | -0.403  | -0.118    |
| $[Ce-(TCA)_2]^-$  | 0.920 | -0.400 | -0.174    | 0.987   | -0.407  | -0.283    |
| $[U-(THIO)_2]^-$  | 0.342 | -0.400 | 0.130     | 0.391   | -0.404  | 0.080     |
| $[Ce-(THIO)_2]^-$ | 0.871 | -0.406 | 0.007     | 0.958   | -0.415  | -0.087    |

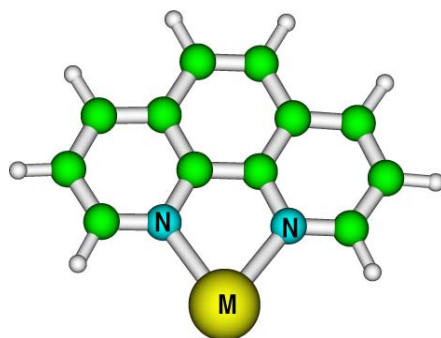

**Figure S1. Molecular structure of Metal-PHEN Complexes, where M= Am/Eu/U/Ce.**

a)

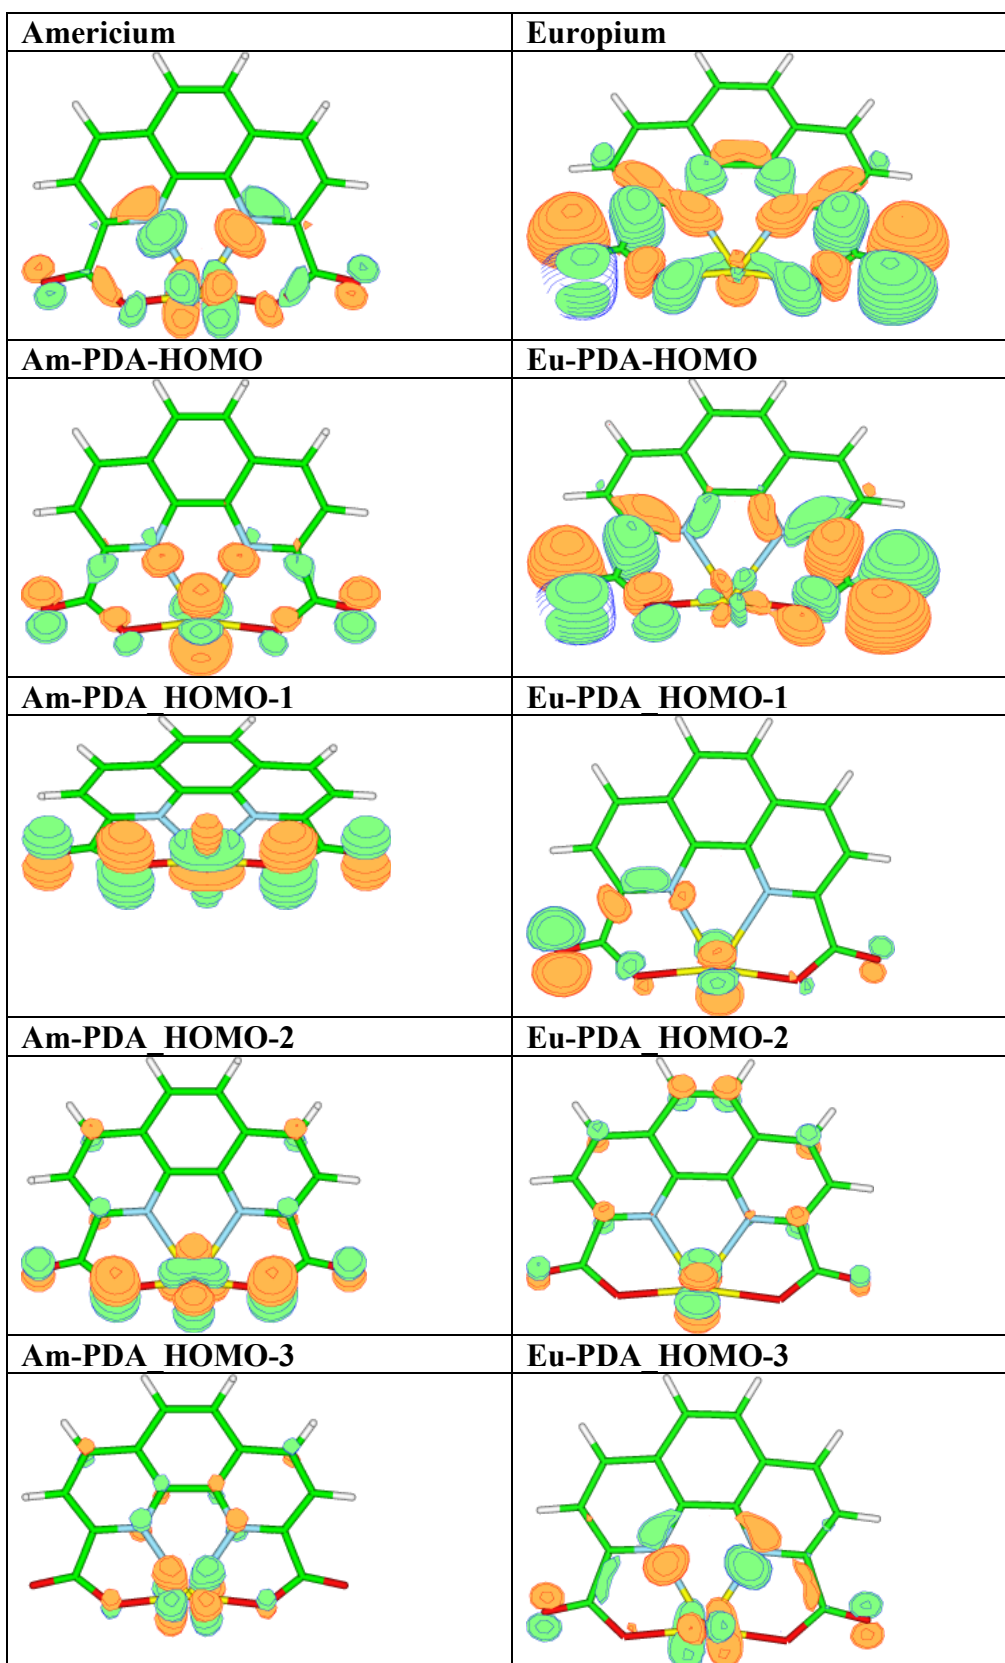



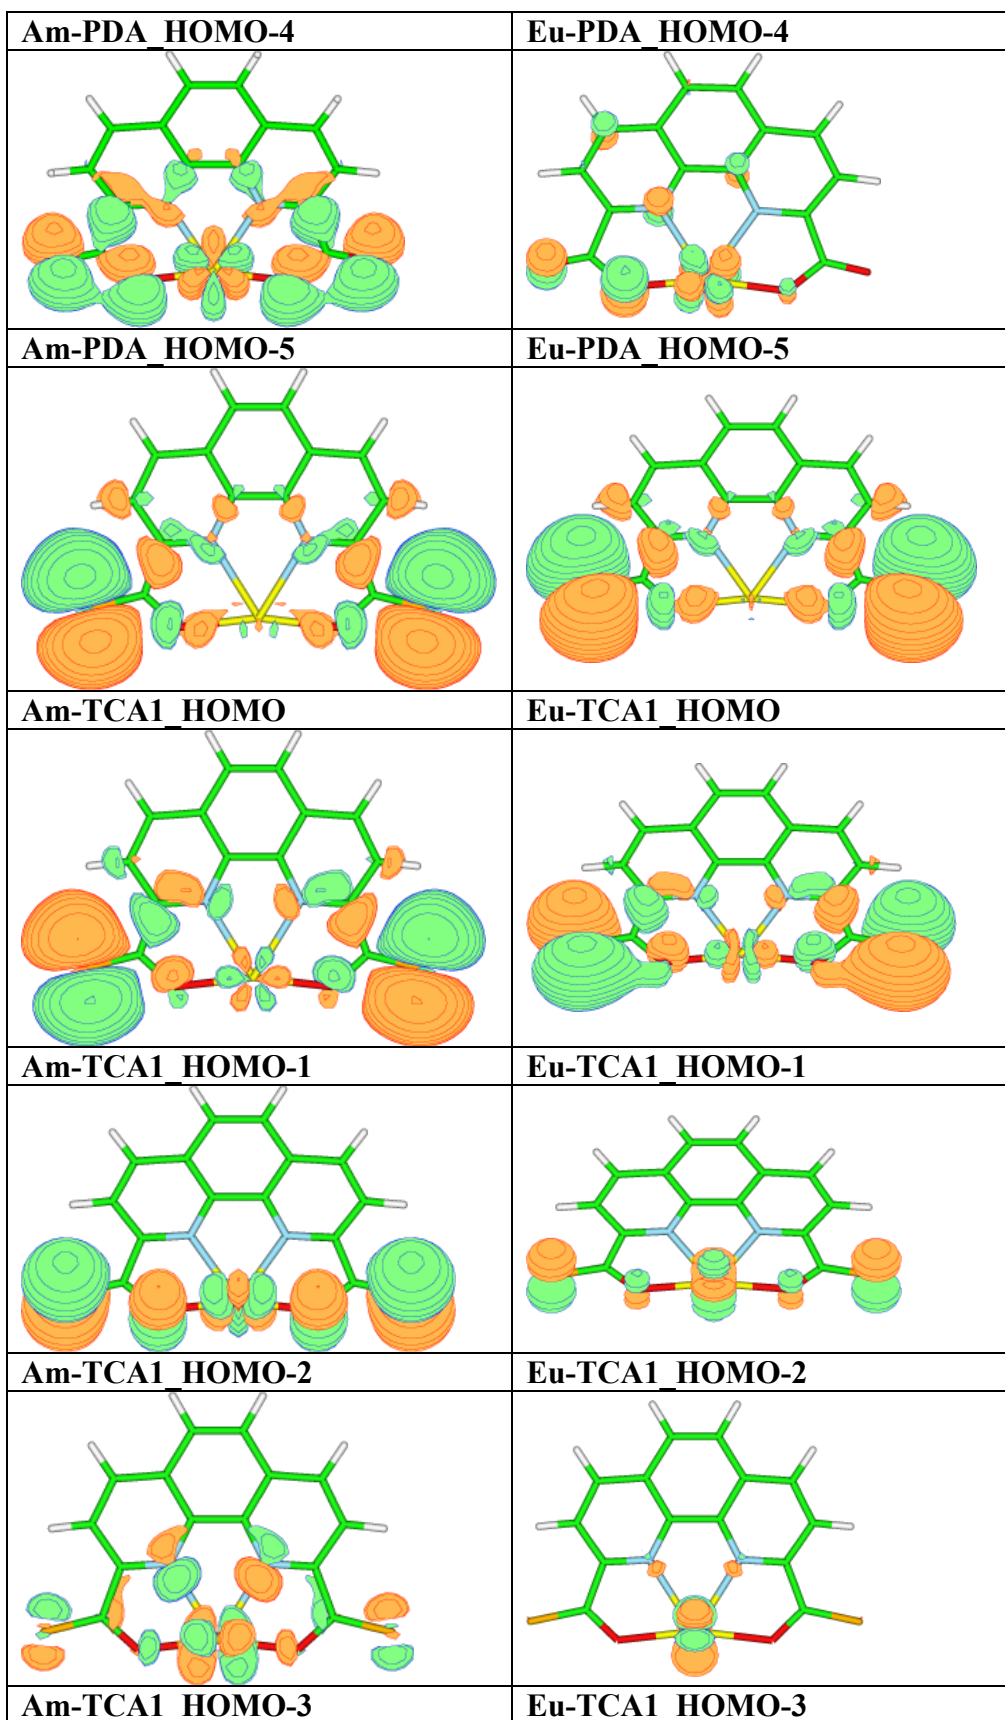

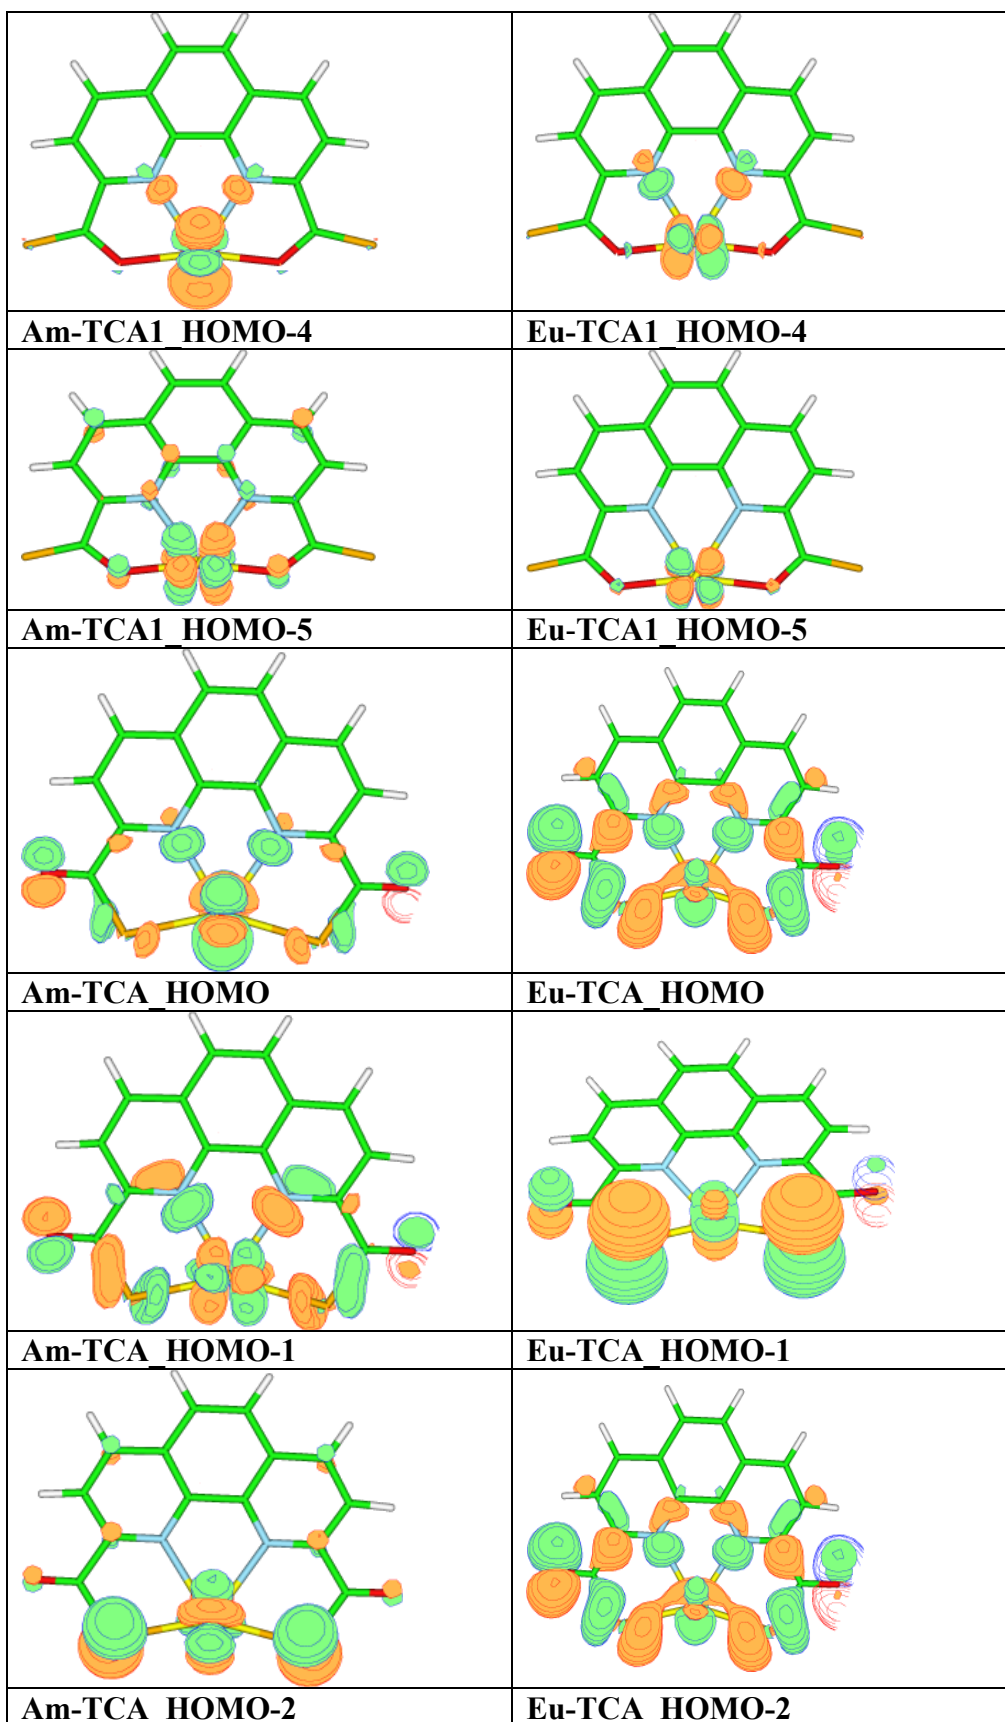

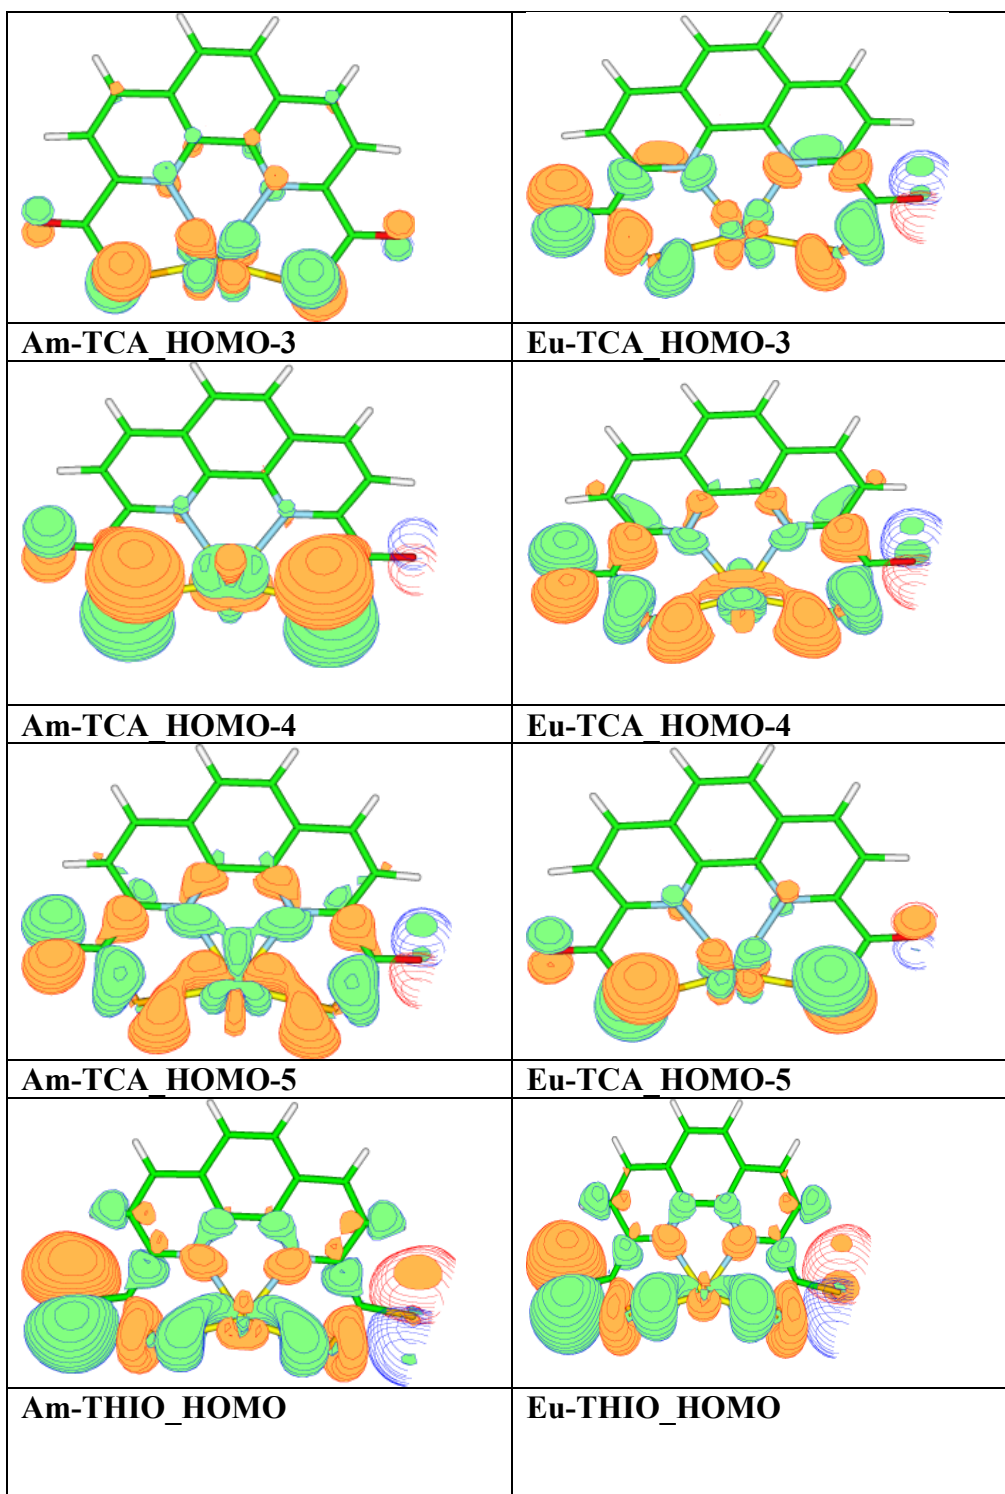

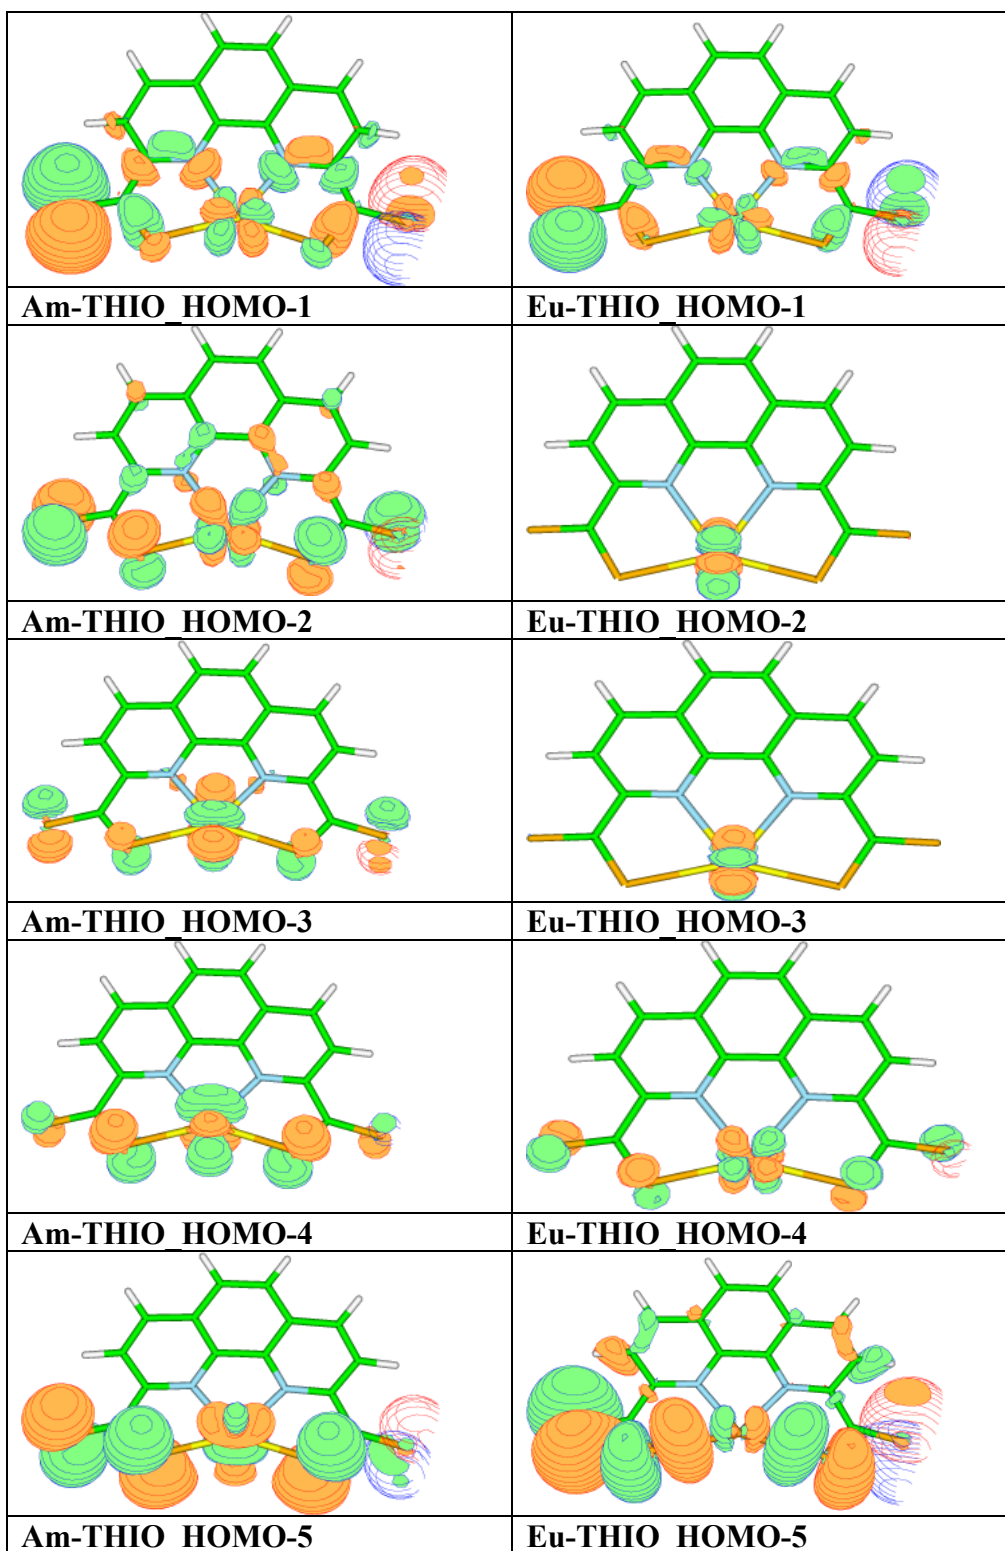

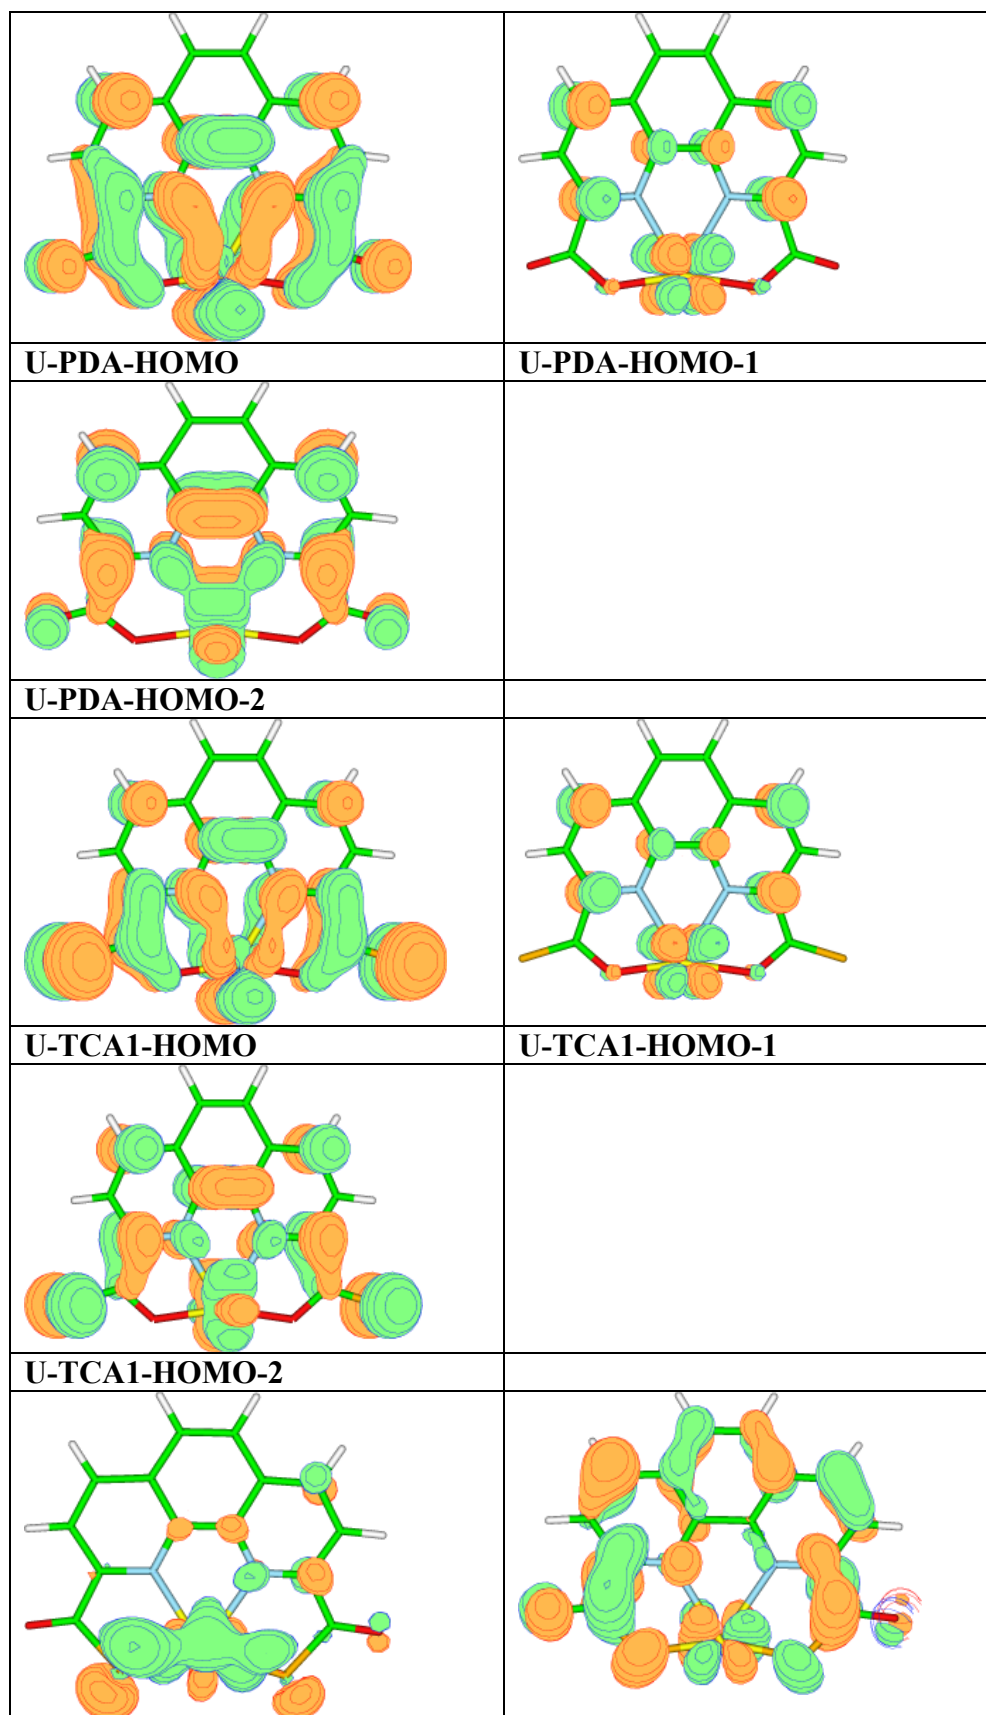

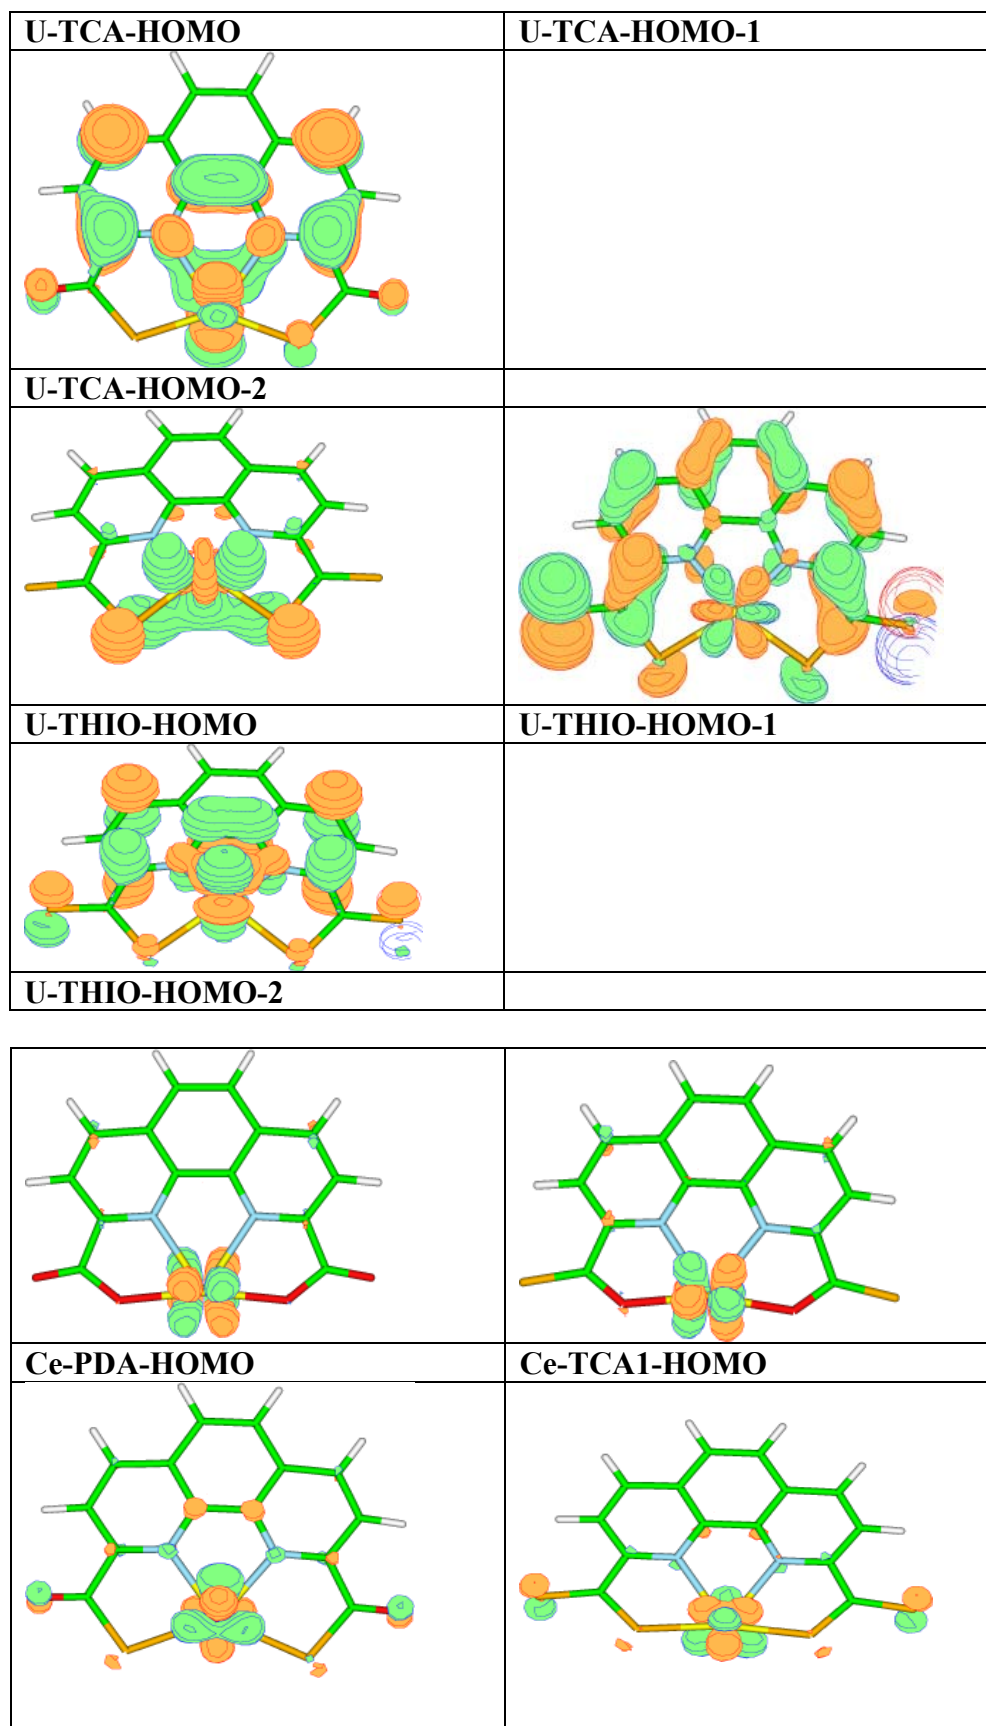

|                    |                     |
|--------------------|---------------------|
| <b>Ce-TCA-HOMO</b> | <b>Ce-THIO-HOMO</b> |
|--------------------|---------------------|

b)

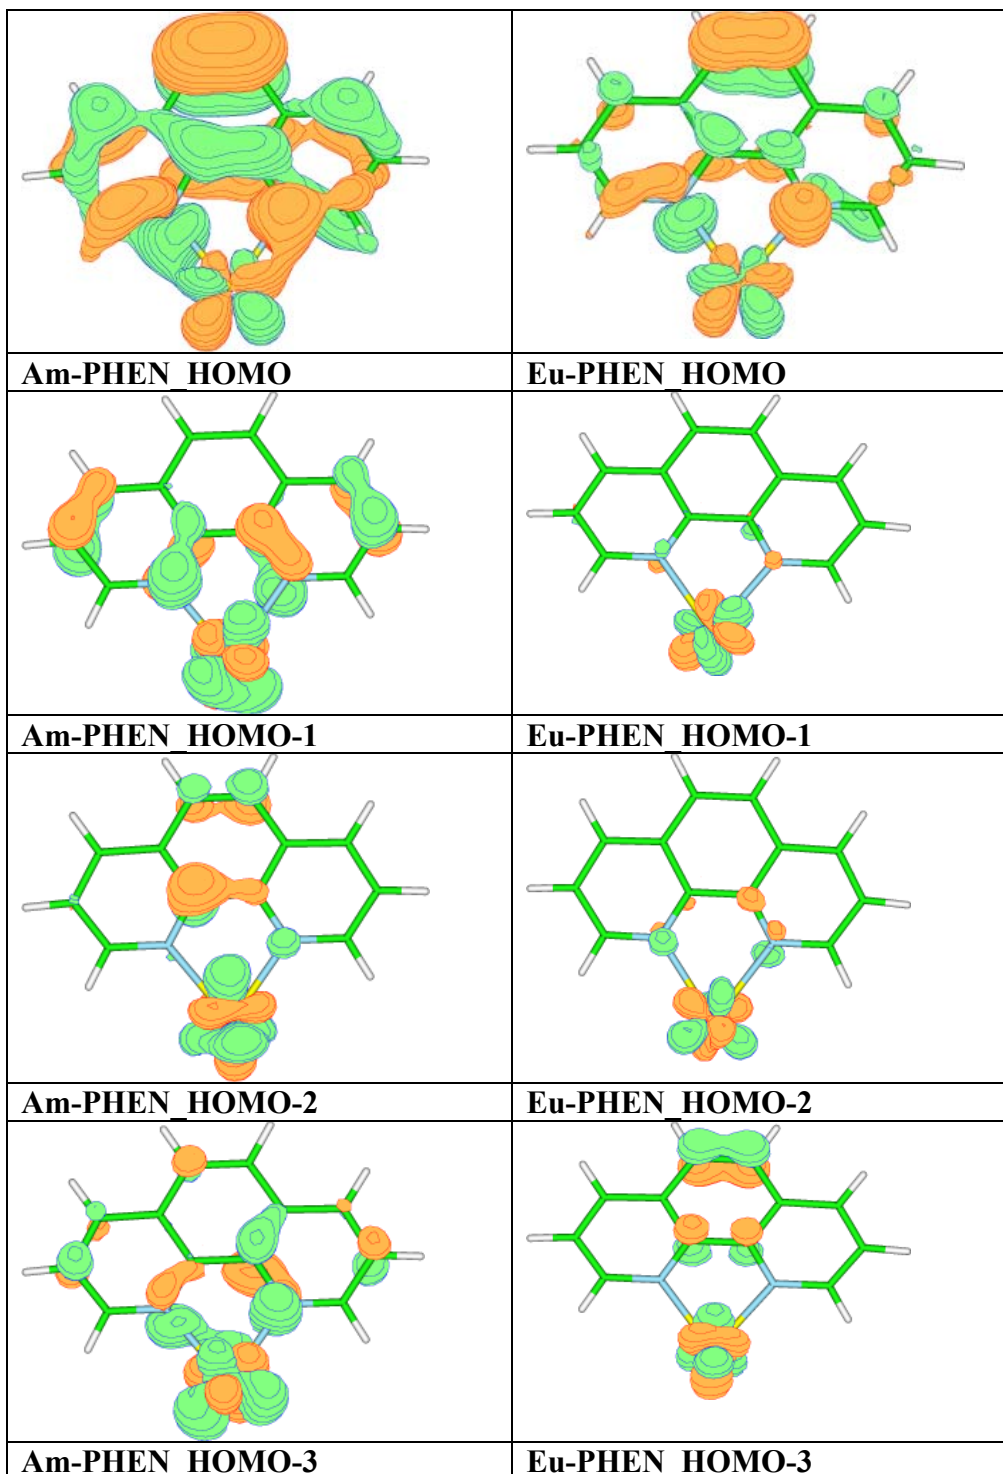

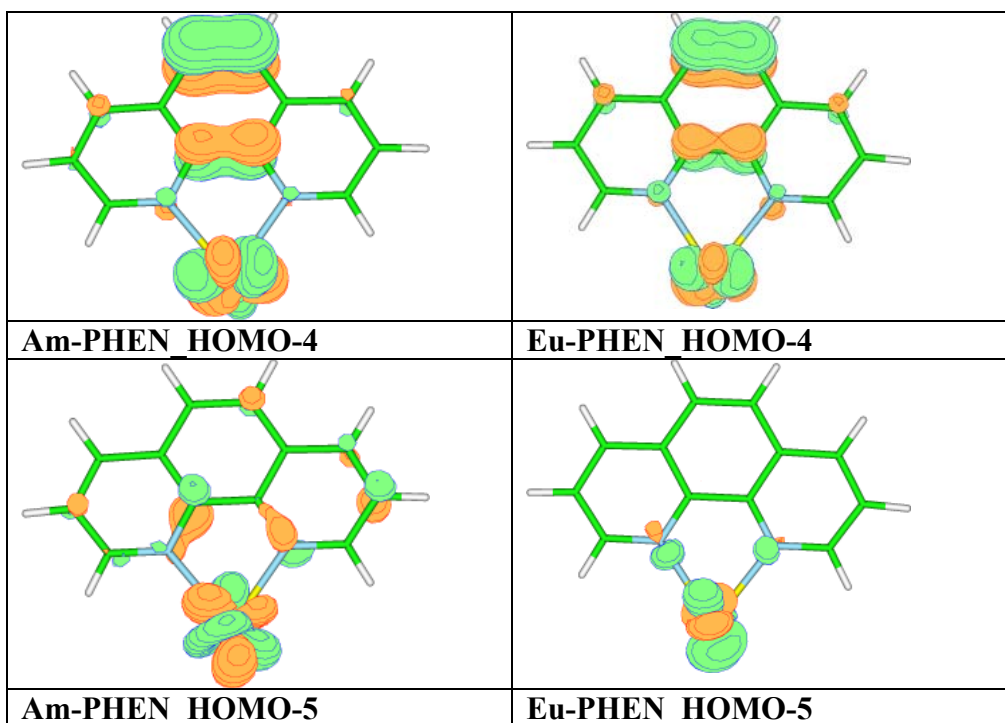

**Figure S2. Valence level occupied molecular orbitals of a) Metal Complexes,  $[ML]^+$  b)  $[M-PHEN]^{3+}$  complexes, where M= Am/Eu/U/Ce, L= PDA, TCA1, TCA, THIO. (1,10-Phenanthroline-2,9-dicarboxylic acid (PDA), 1,10-Phenanthroline-2,9-mono-thio dicarboxylic Acid (binding through Oxygen) (TCA1), 1,10-Phenanthroline-2,9-mono-thio dicarboxylic Acid (binding through Sulphur) (TCA) and 1,10-Phenanthroline-2,9-dithiodicarboxylic Acid (THIO))**
